# Supplementary material for: COVID-19: Sleep, Circadian Rhythms and Immunity – Repurposing Drugs and Chronotherapeutics for SARS-CoV-2
Source: PubMed Central journal article supplement (PMC8249936; doi:10.3389/fnins.2021.674204), 2021-06-18
Supplement: Table_1.pdf [file Table_1.pdf]

**Supplementary Table 1. Drugs that may be repurposed for the treatment of SARS-CoV-2 and associated chronotherapy.**

| Category                                                                       | Drug Names / Classes                                                             | Evidence and scientific rationale for the treatment of SARS-CoV-2 infection and associated chronotherapeutic mechanisms                                                                                                                                                                                                                                                                                                                                                                                                                                                                                                                                                                                                                                                                          | Citations                                                                                                                                                          |
|--------------------------------------------------------------------------------|----------------------------------------------------------------------------------|--------------------------------------------------------------------------------------------------------------------------------------------------------------------------------------------------------------------------------------------------------------------------------------------------------------------------------------------------------------------------------------------------------------------------------------------------------------------------------------------------------------------------------------------------------------------------------------------------------------------------------------------------------------------------------------------------------------------------------------------------------------------------------------------------|--------------------------------------------------------------------------------------------------------------------------------------------------------------------|
| <p><b>Drugs that inhibit or block the life cycle of SARS-CoV-2</b></p>         | <p><b>Antiviral (Remdesivir)</b></p>                                             | <ul style="list-style-type: none"> <li>• Effective against other coronaviruses such as MERS-CoV and SARS-CoV.</li> <li>• Showed superior effect over placebo in shortening the recovery time of hospitalized COVID-19 patients.</li> </ul> <p style="text-align: center;"><i>Evidence for chronotherapy</i></p> <ul style="list-style-type: none"> <li>• Host clock components regulate viral replication either directly or indirectly thereby modulate the viral load.</li> <li>• In a retrospective study, CRP levels reduced significantly when the antiviral drug was administered in the morning compared to the evening.</li> <li>• The dose of acyclovir needed to prevent HSV-2 infection during the active phase was four times more compared to the resting phase in mice.</li> </ul> | <p>(de Wit et al., 2020; Malin et al., 2020)</p> <p>(Madsen, 2020)</p> <p>(Edgar et al., 2016)</p> <p>(De Giorgi et al., 2020)</p> <p>(Matsuzawa et al., 2018)</p> |
| <p><b>Drugs that counteract the insidious effects caused by SARS-CoV-2</b></p> | <p><b>Corticosteroids (Dexamethasone, Prednisone and Methylprednisolone)</b></p> | <ul style="list-style-type: none"> <li>• Corticosteroids are anti-inflammatory drugs that suppress the activation of the immune system, thus prevents cytokine storm.</li> <li>• Meta-analysis of clinical trials showed that corticosteroids reduced the risk of mortality and the duration of mechanical ventilation in patients suffering from ARDS and COVID-19.</li> </ul> <p style="text-align: center;"><i>Evidence for chronotherapy</i></p> <ul style="list-style-type: none"> <li>• Elevated levels of pro-inflammatory cytokines throughout the nighttime.</li> </ul>                                                                                                                                                                                                                 | <p>(Channappanavar and Perlman, 2017)</p> <p>(Mammen et al., 2020; Sterne et al., 2020)</p> <p>(De Silva et al., 1984)</p>                                         |

|  |                                                                           |                                                                                                                                                                                                                                                                                                                                                                                                                                                                                                                                                                                                                                                                                                                                                                                                                                                                                                                                                   |                                                                                                                                                                                                    |
|--|---------------------------------------------------------------------------|---------------------------------------------------------------------------------------------------------------------------------------------------------------------------------------------------------------------------------------------------------------------------------------------------------------------------------------------------------------------------------------------------------------------------------------------------------------------------------------------------------------------------------------------------------------------------------------------------------------------------------------------------------------------------------------------------------------------------------------------------------------------------------------------------------------------------------------------------------------------------------------------------------------------------------------------------|----------------------------------------------------------------------------------------------------------------------------------------------------------------------------------------------------|
|  |                                                                           | <ul style="list-style-type: none"> <li>Prevents the nighttime rise in pro-inflammatory cytokines, particularly IL-6, which may be beneficial for COVID-19, as reported in studies from rheumatoid arthritis patients.</li> </ul>                                                                                                                                                                                                                                                                                                                                                                                                                                                                                                                                                                                                                                                                                                                  | (De Silva et al., 1984; Buttgereit et al., 2008)                                                                                                                                                   |
|  | <b>Blood thinners (Anticoagulants or antiplatelet drugs)</b>              | <ul style="list-style-type: none"> <li>Increased rate of blood clots among hospitalized COVID-19 patients.</li> <li>Full dose anticoagulants when given to moderately ill hospitalized COVID-19 patients, the requirement for vital organ support such as ventilation and ICU was significantly reduced.</li> <li>Prophylactic anticoagulation administration did not increase the risk of serious bleeding in COVID-19 patients.</li> </ul> <p style="text-align: center;"><i>Evidence for chronotherapy</i></p> <ul style="list-style-type: none"> <li>Hypercoagulatory and hypofibrinolytic conditions are more frequent in the morning because of increased platelet activity and concentration of coagulation factors like Factor V, VII, and prothrombin fragment F<sub>1+2</sub>, and D-dimer.</li> <li>Rivaroxaban and Aspirin both have been shown to exert better effects when taken in the evening compared to the morning.</li> </ul> | <p>(Malas et al., 2020)</p> <p>(Health, 2021)</p> <p>(Rentsch et al., 2021)</p> <p>(Kapiotis et al., 1997)</p> <p>(Bonten et al., 2015; Brunner-Ziegler et al., 2016; van Diemen et al., 2020)</p> |
|  | <b>Cationic Amphiphilic Drugs (Amiodarone, Chlorpromazine, and SERMs)</b> | <ul style="list-style-type: none"> <li>The anti-arrhythmic drug, amiodarone prevents the fusion of the viral envelop with the endosomal membrane and accumulates in late endosomes/ lysosomes, and disrupts the viral endocytic pathway.</li> <li>Amiodarone prevents entry of the Filovirus and methyl-diethanolamine (metabolite) was able to inhibit Ebola virus entry.</li> <li>Amiodarone increased the survival of mice infected with the Ebola virus.</li> </ul>                                                                                                                                                                                                                                                                                                                                                                                                                                                                           | <p>(Salata et al., 2015)</p> <p>(Gehring et al., 2014; Salata et al., 2015)</p> <p>(Madrid et al., 2015)</p>                                                                                       |

|  |  |                                                                                                                                                                                                                                                                                                                                                                                                                                                                                                                                                                                                                                                                                                                                                                                                                                                                                                                                                                                                                                                                                                                                                                                                                                                                                                                                                                                                        |                                                                                                                                                                                                                                                                                                                                                                                                                                             |
|--|--|--------------------------------------------------------------------------------------------------------------------------------------------------------------------------------------------------------------------------------------------------------------------------------------------------------------------------------------------------------------------------------------------------------------------------------------------------------------------------------------------------------------------------------------------------------------------------------------------------------------------------------------------------------------------------------------------------------------------------------------------------------------------------------------------------------------------------------------------------------------------------------------------------------------------------------------------------------------------------------------------------------------------------------------------------------------------------------------------------------------------------------------------------------------------------------------------------------------------------------------------------------------------------------------------------------------------------------------------------------------------------------------------------------|---------------------------------------------------------------------------------------------------------------------------------------------------------------------------------------------------------------------------------------------------------------------------------------------------------------------------------------------------------------------------------------------------------------------------------------------|
|  |  | <ul style="list-style-type: none"> <li>• Amiodarone also inhibits other viruses like the Arenavirus, the SARS-CoV-1, and Hepatitis C virus.</li> <li>• Arrhythmias are common among COVID-19 patients, and it is associated with higher morbidity and mortality.</li> <li>• Chlorpromazine exhibits antiviral activity against the Crimean-congo hemorrhagic fever virus, Adenovirus, Ebola virus, MERS-CoV, and SARS-CoV.</li> <li>• Chlorpromazine blocks the formation of clathrin-coated pits and thus prevents viral entry into the cells</li> <li>• Selective estrogen receptor modulators (SERMs) have protective functions against MERS-CoV, Ebola virus, HSV-1, and HCV</li> <li>• SERM, clomiphene possess antiviral activity against the Ebola virus by interfering with the late-stage fusion of the viral envelope and the endosomal membrane.</li> <li>• Clomiphene blocks the Ebola virus entry by inhibiting the NPC1-dependent pathway, which has been hypothesized to increase cholesterol accumulation in the late endosomes and impair viral entry for SARS-CoV-2</li> </ul> <p style="text-align: center;"><i>Evidence for chronotherapy</i></p> <ul style="list-style-type: none"> <li>• Prior studies suggest that cardiac arrhythmia peaks mostly between 6:00 am and 12:00 noon. Arrhythmogenesis appeared to be less frequent or suppressed during the nighttime.</li> </ul> | <p>(Stadler et al., 2008; Cheng et al., 2013; Gehring et al., 2014)</p> <p>(Babapoor-Farrokhran et al., 2020)</p> <p>(Bhattacharyya et al., 2010; Diaconu et al., 2010; Dyllal et al., 2014; Ferraris et al., 2015)</p> <p>(Daniel et al., 2015)</p> <p>(Johansen et al., 2013; Murakami et al., 2013; Zheng et al., 2014)</p> <p>(Nelson et al., 2016)</p> <p>(Ghasemnejad-Berenji et al., 2020)</p> <p>(Portaluppi and Hermida, 2007)</p> |
|--|--|--------------------------------------------------------------------------------------------------------------------------------------------------------------------------------------------------------------------------------------------------------------------------------------------------------------------------------------------------------------------------------------------------------------------------------------------------------------------------------------------------------------------------------------------------------------------------------------------------------------------------------------------------------------------------------------------------------------------------------------------------------------------------------------------------------------------------------------------------------------------------------------------------------------------------------------------------------------------------------------------------------------------------------------------------------------------------------------------------------------------------------------------------------------------------------------------------------------------------------------------------------------------------------------------------------------------------------------------------------------------------------------------------------|---------------------------------------------------------------------------------------------------------------------------------------------------------------------------------------------------------------------------------------------------------------------------------------------------------------------------------------------------------------------------------------------------------------------------------------------|

|  |                                                               |                                                                                                                                                                                                                                                                                                                                                                                                                                                                                                                                                                                                                                                                                                                                                                                                                                                                                                                                                                                                                                                                                                                                                                                                                                                                                                                                                                                                                        |                                                                                                                                                                                                            |
|--|---------------------------------------------------------------|------------------------------------------------------------------------------------------------------------------------------------------------------------------------------------------------------------------------------------------------------------------------------------------------------------------------------------------------------------------------------------------------------------------------------------------------------------------------------------------------------------------------------------------------------------------------------------------------------------------------------------------------------------------------------------------------------------------------------------------------------------------------------------------------------------------------------------------------------------------------------------------------------------------------------------------------------------------------------------------------------------------------------------------------------------------------------------------------------------------------------------------------------------------------------------------------------------------------------------------------------------------------------------------------------------------------------------------------------------------------------------------------------------------------|------------------------------------------------------------------------------------------------------------------------------------------------------------------------------------------------------------|
|  |                                                               | <ul style="list-style-type: none"> <li>• A relatively lower dose of chlorpromazine administered at 1:30 was able to show the same sedative effect than when administered at 7:30 (on a 24-hour clock).</li> </ul>                                                                                                                                                                                                                                                                                                                                                                                                                                                                                                                                                                                                                                                                                                                                                                                                                                                                                                                                                                                                                                                                                                                                                                                                      | (Nagayama et al., 1978)                                                                                                                                                                                    |
|  | <p><b>Janus-associated Kinase Inhibitor (Baricitinib)</b></p> | <ul style="list-style-type: none"> <li>• JAK inhibitors can prevent the phosphorylation of proteins that are involved in the signal transduction cascade of the Jak-Stat pathway and thereby reduce cytokine-mediated inflammation and collateral damage in the vital organs.</li> <li>• Baricitinib significantly reduced the median number of days to recovery, from 18 to 10 days, in hospitalized COVID-19 patients requiring high-flow oxygen or non-invasive ventilation, when used together with remdesivir.</li> <li>• The need for ventilation support or death was reduced by &gt; 50% (34.9% to 16.9%) using Baricitinib compared to the placebo/control group.</li> <li>• Baricitinib can successfully inhibit type-1 interferon response (exaggerated in COVID-19 patients) that increases ACE2 expression (in liver cells), the receptor that plays an essential role in the entry of SARS-CoV-2 in host cells to increase the viral load.</li> <li>• Baricitinib is a potent inhibitor of the Numb-associated kinase (NAK) family of proteins, particularly AAK1, that plays a pivotal role in clathrin-mediated endocytosis, which further prevents viral entry into the cells.</li> </ul> <p style="text-align: center;"><i>Evidence for chronotherapy</i></p> <ul style="list-style-type: none"> <li>• Studies have shown a peak in IL-6 levels during nighttime and early morning hours.</li> </ul> | <p>(Lin et al., 2020)</p> <p>(Kalil et al., 2020)</p> <p>(Stebbing et al., 2021).</p> <p>(Stebbing et al., 2021)</p> <p>(Conner and Schmid, 2002; Sorrell et al., 2016)</p> <p>(Vgontzas et al., 2005)</p> |

|                                                                                   |                                                         |                                                                                                                                                                                                                                                                                                                                                                                                                                                                                                                                                                                                                                                                                                                                                  |                                                                                                                                                                                                                                                                                     |
|-----------------------------------------------------------------------------------|---------------------------------------------------------|--------------------------------------------------------------------------------------------------------------------------------------------------------------------------------------------------------------------------------------------------------------------------------------------------------------------------------------------------------------------------------------------------------------------------------------------------------------------------------------------------------------------------------------------------------------------------------------------------------------------------------------------------------------------------------------------------------------------------------------------------|-------------------------------------------------------------------------------------------------------------------------------------------------------------------------------------------------------------------------------------------------------------------------------------|
|                                                                                   |                                                         | <ul style="list-style-type: none"> <li>• A better outcome was observed when Baricitinib was administered during the time (evening) when the cytokine production was at the highest.</li> </ul>                                                                                                                                                                                                                                                                                                                                                                                                                                                                                                                                                   | (Yaekura et al., 2020)                                                                                                                                                                                                                                                              |
| <b>Drugs that manage comorbidities and pleiotropic effects against SARS-CoV-2</b> | <b>Hyperlipidemia drug (Statins)</b>                    | <ul style="list-style-type: none"> <li>• Anti-inflammatory effects can block the infectious potential of enveloped viruses (<i>in vitro</i>) and considerably reduce the mortality risk among COVID-19 patients.</li> <li>• Independently associated with lower ICU admission among COVID-19 patients.</li> <li>• Reduce hyperlipidemia and decrease cytokine levels with its pleiotropic effects under different non-infectious conditions.</li> </ul> <p style="text-align: center;"><i>Evidence for chronotherapy</i></p> <ul style="list-style-type: none"> <li>• Cholesterol synthesis peaks between 12:00 am and 6:00 am.</li> <li>• Administration of Statins in the evening is more effective than when taken in the morning.</li> </ul> | <p>(Rossi et al., 2020)</p> <p>(Tan et al., 2020)</p> <p>(Wassmann et al., 2003; Fang et al., 2005), NCT02056340</p> <p>(Izquierdo-Palomares et al., 2016)</p> <p>(Saito et al., 1991; Lund et al., 2002; Wallace et al., 2003; Ozaydin et al., 2006; Tharavanij et al., 2010).</p> |
|                                                                                   | <b>Antihypertensive drugs (ACE inhibitors and ARBs)</b> | <ul style="list-style-type: none"> <li>• Acute lung damage can be reduced by renin-angiotensin-aldosterone system inhibitors.</li> <li>• Case fatalities are much higher in COVID-19 patients due to pulmonary hypertension. Hypertensive drugs are associated with decreased mortality.</li> </ul> <p style="text-align: center;"><i>Evidence for chronotherapy</i></p> <ul style="list-style-type: none"> <li>• Blood pressure (BP) is higher during early mornings. Increased nighttime ambulatory BP is related to fatal and non-fatal cardiovascular events.</li> </ul>                                                                                                                                                                     | <p>(Baral et al., 2020)</p> <p>(Surveillances, 2020)</p> <p>(Elliott, 1999)</p>                                                                                                                                                                                                     |

|                                                                           |                                                                              |                                                                                                                                                                                                                                                                                                                                                                                                                                                                                                                                                                                                                                                                                                                                                                                                                                                                                                                                                                                                                                                                                                                                                                                    |                                                                                                                                                                                                                                                                                                  |
|---------------------------------------------------------------------------|------------------------------------------------------------------------------|------------------------------------------------------------------------------------------------------------------------------------------------------------------------------------------------------------------------------------------------------------------------------------------------------------------------------------------------------------------------------------------------------------------------------------------------------------------------------------------------------------------------------------------------------------------------------------------------------------------------------------------------------------------------------------------------------------------------------------------------------------------------------------------------------------------------------------------------------------------------------------------------------------------------------------------------------------------------------------------------------------------------------------------------------------------------------------------------------------------------------------------------------------------------------------|--------------------------------------------------------------------------------------------------------------------------------------------------------------------------------------------------------------------------------------------------------------------------------------------------|
|                                                                           |                                                                              | <ul style="list-style-type: none"> <li>• Lessing BP at night and early morning hours markedly reduce cardiovascular events by administering hypertensive drugs before bedtime or in the evening.</li> </ul>                                                                                                                                                                                                                                                                                                                                                                                                                                                                                                                                                                                                                                                                                                                                                                                                                                                                                                                                                                        | <p>(Hermida et al., 2007; Hermida and Ayala, 2009; Hermida et al., 2010; Hoshino et al., 2010; Zeng et al., 2011; Bowles et al., 2018; Hermida et al., 2020)</p>                                                                                                                                 |
| <p><b>Chronotherapeutic drugs that may be used against SARS-CoV-2</b></p> | <p><b>REV-ERB<math>\alpha</math> agonists (e.g., SR9009 and GSK2667)</b></p> | <ul style="list-style-type: none"> <li>• Boost the endurance performance by increasing mitochondria numbers/counts in skeletal muscles and significantly reduce cholesterol and body weight.</li> <li>• Lower anxiety to a level as effective as benzodiazepine.</li> <li>• Reduces inflammation by interfering with the production of inflammatory cytokines like TNF<math>\alpha</math>, CCL2, and MMP-9 <i>in vitro</i> in nerve cells and <i>in vivo</i> rat lungs.</li> <li>• Reducing blood vessel lesions and hardening of arteries.</li> <li>• SR9009 can successfully inhibit positive-strand RNA viruses such as the Flaviviridae family (e.g., Hepatitis C virus, Dengue, and the Zika virus).</li> <li>• Regulate HIV-1 replication by inhibiting promoter activity in CD4<sup>+</sup> T cells and macrophages.</li> <li>• Successfully inhibits the replication of alphaviruses like Chikungunya and o'nyong'nyong virus by suppressing the synthesis of the structural proteins.</li> <li>• Selectively regulate pro-inflammatory cytokines like IL-6, which has been considered as a prognostic marker for mortality among SARS-CoV-2 infected patients.</li> </ul> | <p>(Solt et al., 2012; Woldt et al., 2013)</p> <p>(Banerjee et al., 2014)</p> <p>(Li et al., 2014; Morioka et al., 2016)</p> <p>(Sitaula et al., 2015)</p> <p>(Zhuang et al., 2019)</p> <p>(Borrmann et al., 2020)</p> <p>(Hwang et al., 2018)</p> <p>(Gibbs et al., 2012; Liu et al., 2020)</p> |
